# Supplementary material for: Selective support of engineered T cells using a cis-targeted interleukin-2 enhances anti-tumor activity and obviates the need for lymphodepletion
Source: Research Square preprint supplement (doi:10.21203/rs.3.rs-5962170/v1), 2025-05-05
Supplement: Supplementary file 1 [file 1d93d6a717c14a9b9f2dfd2f.docx]

**Supplementary Table S2**. Antibodies used in this study.

| **Species** | **Target** | **Fluor** | **Clone** | **Vendor** | **Catalog #** |
| --- | --- | --- | --- | --- | --- |
| Mouse | CD3 | BUV395 | UCHT1 | BD | 563546 |
| Mouse | CD4 | BUV805 | RPA-T4 | BD | 742000 |
| Mouse | CD8 | BV605 | SK1 | Biolegend | 344742 |
| Mouse | CD62L | BV650 | DREG-56 | Biolegend | 304832 |
| Mouse | CD45RO | BV421 | UCHL1 | Biolegend | 304224 |
| Rat | CD45 | BV510 | 30-F11 | Biolegend | 103138 |
| Mouse | EGFR | AF488 | AY13 | Biolegend | 352908 |
| Mouse | CD28 | PE | CD28.2 | Biolegend | 302908 |
| Mouse | PD-1 | PE-Dazzle 594 | EH12.2H7 | Biolegend | 329940 |
| Mouse | Granzyme B | PE-Cy7 | QA16A02 | Biolegend | 372214 |
| Mouse | CD45 | AF700 | HI30 | Biolegend | 304024 |
| Mouse | CD45RA | APC-Cy7 | HI100 | Biolegend | 304128 |
| Mouse | FMC63 | AF488 | Y45 | AcroBiosystems | FM3-Y45 |
| Mouse | B7H3 | BUV737 | 7-517 | BD | 748379 |
| Mouse | Perforin | BV421 | dG9 | Biolegend | 308122 |
| Rat | MHC-I I-A/I-E | BV510 | M5/114.15.2 | Biolegend | 107635 |
| Rat | CD45 | BV510 | 30-F11 | Biolegend | 103137 |
| Mouse | CD4 | BV605 | RPA-T4 | Biolegend | 300556 |
| Mouse | HLA-A2 | BV650 | BB7.2 | Biolegend | 343324 |
| Mouse | CD25 | BV785 | BC96 | Biolegend | 302638 |
| Mouse | LAG3 | AF488 | 11C3C65 | Biolegend | 369326 |
| Mouse | FoxP3 | BB700 | 236A/E7 | BD | 566526 |
| Mouse | PD-1 | PE | EH12.2H7 | Biolegend | 329906 |
| Mouse | 4-1BB | PE-Dazzle594 | 4B4-1 | Biolegend | 309826 |
| Mouse | CD3 | APC-AF700 | UCHT1 | Biolegend | 300424 |
| Mouse | CD8 | BUV395 | OKT8 | BD | 753756 |
| Mouse | CD4 | BUV395 | L200 | BD | 564107 |
| Mouse | CD14 | BUV737 | M5E2 | BD | 612763 |
| Mouse | CD20 | BUV805 | 2H7 | BD | 612905 |
| Mouse | CD11c | BV421 | 3.9 | Biolegend | 301628 |
| Mouse | CD56 | BV510 | HCD56 | Biolegend | 318340 |
| Mouse | CD3 | BV650 | SP34.2 | BD | 563916 |
| Mouse | CD8a | BV785 | SK1 | Biolegend | 344740 |
| Mouse | CD16 | FITC | 3G8 | Biolegend | 302006 |
| Mouse | pSTAT3 (pY705) | PE | 4/P-STAT3 | BD | 562072 |
| Mouse | EGFR | AF647 | Panitumumab | In-house |  |
| Mouse | HLA-DR | G46-6 | APC-AF700 | BD | 560743 |
| Mouse | CD3 | PE-Cy7 | UCHT1 | Biolegend | 300420 |
| Rhesus, Cynomolgus, Baboon | CD45 | APC | D058-1283 | BD biosciences | 561290 |
| Rhesus, Cynomolgus, Baboon | CD45 | FITC | D058-1283 | BD biosciences | 557803 |
| Rhesus, Cynomolgus, Baboon | CD45 | BV786 | D058-1283 | BD biosciences | 563861 |
| Rhesus, Cynomolgus, Baboon (QC Testing), Human | CD3 | BV421 | SP34-2 | BD biosciences | 562877 |
|  | Anti-RITUXIMAB | APC | Anti-MS4A1/CD20 | R&D | FAB9630R |
| Human, All Species Expected | G4S Linker | AF488 | e702v | Cell Signaling | 50515S |
| Human, Cynomolgus, Rhesus | CD4 | APC CY7 | OKT4 | Biolegend | 317418 |
| Human, Cynomolgus, Rhesus | CD8a | BV650Q | RPA-T8 | Biolegend | 301042 |
| Human, Cynomolgus, Rhesus | CD20 | BV785 | 2H7 | Biolegend | 302356 |
| human | EGFR | BV711 | AY13 | Biolegend | 352920 |
| human | EGFR | PE | AY13 | Biolegend | 352904 |
| Human, Cynomolgus, Rhesus | CD20 | PE | 2H7 | Biolegend | 302306 |
| human, Baboon, Cynomolgus, Rhesus | Ig light chain lambda | APC | MHL-38 | Biolegend | 316610 |
| Human | CD19 | PE-CY 5.5 | J3-119 | Beckman | A66328 |
| Human | CD8 | BV650 | RPA-T8 | BD horizon | 563821 |
| Human | CD8a | BV605 | RPA-T8 | Biolegend | 301040 |
| Human | CD8 | BV605 | SK1 | BD horizon | 564116 |
| Human | CD8a | bv711 | RPA-T8 | Biolegend | 301044 |
| Human | CD8 | APC | SK1 | Biolegend | 344722 |
| Human | CD4 | PE | RPA-T4 | Invitrogen | 12-0049-42 |
| Human | CD4 | BV421 | A161A1 | Biolegend | 357424 |
| Human | CD4 | BV711 | SK3 | BD horizon | 563028 |
| Human | aCD19 CAR | AF488 |  | Asher | RN331-01 |
| Human | anti-FMC63 | AF488 |  | Asher | B2 331-01 |
| Human | CD69 | APC Cy7 | fn50 | BD Pharmingen | 557756 |
| Human | CD62L | APC | SK11 | BD Pharmingen | 566791 |
| Human | CD62L L SELECTIN | APC | DREG-56 | Invitrogen | 17-0629-42 |
| Human | CD62L | APC | 145/15 |  | 130-113-617 |
| Human | HLA-DR | AF700 | LN3 | Invitrogen | 56-9956-42 |
| Human | pd1 CD279 | percp cy 5.5 | EH12.1 | BD Pharmingen | 561273 |
| Human | HLA-DR | APC CY7 | I.243 | Biolegend | 307618 |
| Human | CD360- IL21R | PE | 2SX21R | Invitrogen | 12-3601-42 |
| Human | CCR7 CD197 | BV421 | 2-L1-A | BD horizon | 566743 |
| Human | LAG3 | BV605 | 11C3C65 | Biolegend | 369324 |
| Human | CD45RA | BV786 | HI100 | BD horizon | 563870 |
| Human | 41BB CD137 | BV650 | 4B4-1 | BD horizon | 564092 |
| mouse | CD45 | APC | 30-F11 | Biolegend | 103112 |
| Human | CD45 | BV421 | HI30 | Biolegend | 304032 |
| Human | CD3 | PE/CY7 | UCHT1 | Biolegend | 300420 |
| Human | G4S LINKER | APC | E702V | R & D | 69782S |
| Human | CD19 | APC | HIB19 | Thermofisher | 17-0199-42 |
| mouse | cd45 | APC/CY7 | 30-F11 | Biolegend | 103116 |
| Human | CD25 | APC | BC96 | BD Pharmingen | 567316 |
