# Supplementary material for: Selective support of engineered T cells using a cis-targeted interleukin-2 enhances anti-tumor activity and obviates the need for lymphodepletion
Source: Research Square preprint supplement (doi:10.21203/rs.3.rs-5962170/v1), 2025-05-05
Supplement: Supplementary file 2 [file 274b6165ce218caaa94c48e2.docx]

**Supplementary Table S1,** Molecules used in this study

| **Molecule** | **Description** | **Fc** | **IL-2** | **IL-2Rα binding** | **IL-2Rβγ binding (human)** | **IL-2Rβγ binding (rhesus)** |
| --- | --- | --- | --- | --- | --- | --- |
| Panitumumab | Anti-human EGFR antibody | hIgG1 with knob-in-hole mutations used for single IL-2 fusion; L234A, L235A, and G237A mutations to abolish FcγR interactions | None | NA | NA | NA |
| Ab43 | Anti-human EGFRt-selective antibody |
| CTRL-IL2m1 | Control antibody (anti-HA) fused to single IL-2 mutein via flexible glycine-serine linker. | Human | None | Low | ND |
| CTRL-IL2m2 | Control antibody (anti-HA) fused to single IL-2 mutein via flexible glycine-serine linker. | Very low |
| WT IL-2-Fc | Fc fusion to single IL-2 WT molecule via flexible glycine-serine linker. | Wild-type | Wild-type | Wild-type |
| CAR-IL2m1 | Anti-human CD19 CAR antibody (FMC63 clone) fused to single IL-2 mutein via flexible glycine-serine linker. | None | Low | ND |
| Panit-IL2m1 | Anti-human EGFR antibody (panitumumab) fused to single IL-2 mutein via flexible glycine-serine linker. | Low | ND |
| Panit-IL2m2 | Anti-human EGFR antibody (panitumumab) (FMC63 clone) fused to single IL-2 mutein via flexible glycine-serine linker. | Very low | ND |
| Ab43-IL2m2 or EGFRt-IL2 | Anti-human EGFRt-selective antibody (clone Ab43) fused to single IL-2 mutein via flexible glycine-serine linker. | Very low | ND |
| Ab43-IL2m3 or EGFRt-IL2 when used in rhesus in vivo studies | Anti-human EGFRt-selective antibody (clone Ab43) fused to single IL-2 mutein via flexible glycine-serine linker. | Low-medium | Low |
